# Supplementary material for: Chloramphenicol-borate/boronate complex for controlling infections by chloramphenicol-resistant bacteria
Source: PubMed Central journal article supplement — RSC Adv. 2018 May 16;8(32):18016–22. doi: 10.1039/c8ra02227e (PMC9080503; doi:10.1039/c8ra02227e), 2018-05-16
Supplement: RA-008-C8RA02227E-s001.pdf [file RA-008-C8RA02227E-s001.pdf]

**Supplementary Information**

**Chloramphenicol-borate/boronate Complex for Controlling Infections  
by Chloramphenicol-Resistant Bacteria**

Prabuddha Bhattacharya<sup>a</sup>, Monisha Singa<sup>a</sup>, Kalyan Senapati<sup>b</sup>, Suman Saha<sup>c</sup>, Sudipa Mandal<sup>d</sup>,  
Santi M. Mandal<sup>a</sup>, Ananta K. Ghosh<sup>a</sup>, Amit Basak<sup>a,\*</sup>

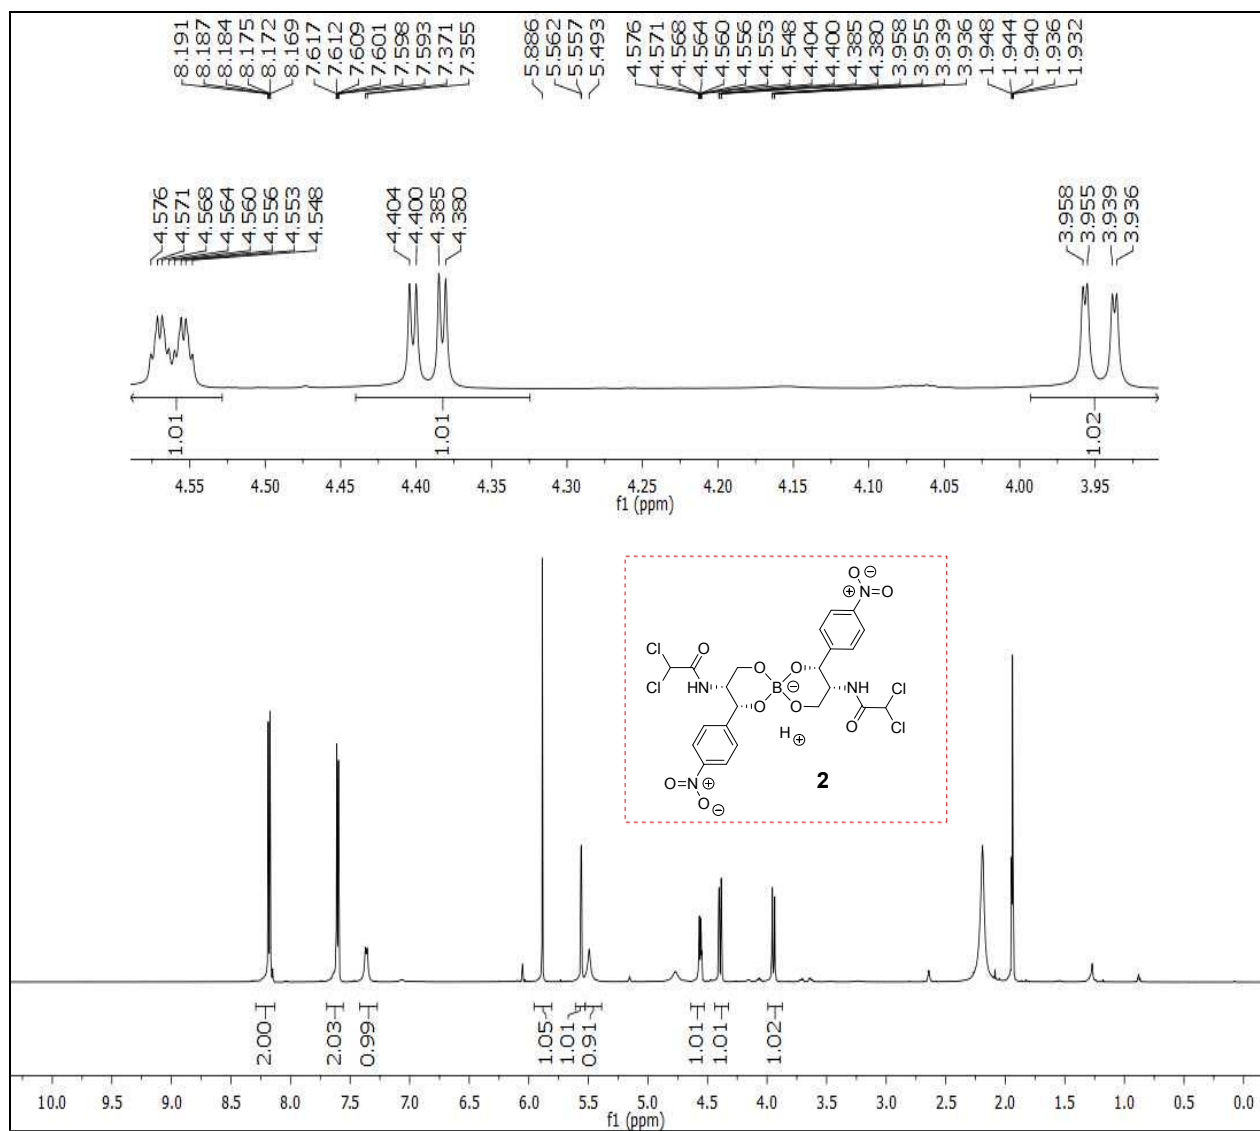

**Figure S1.**  $^1\text{H}$  NMR spectrum of Chloramphenicol-borate ester (**2**) in  $\text{CD}_3\text{CN}$ , in 600 MHz.

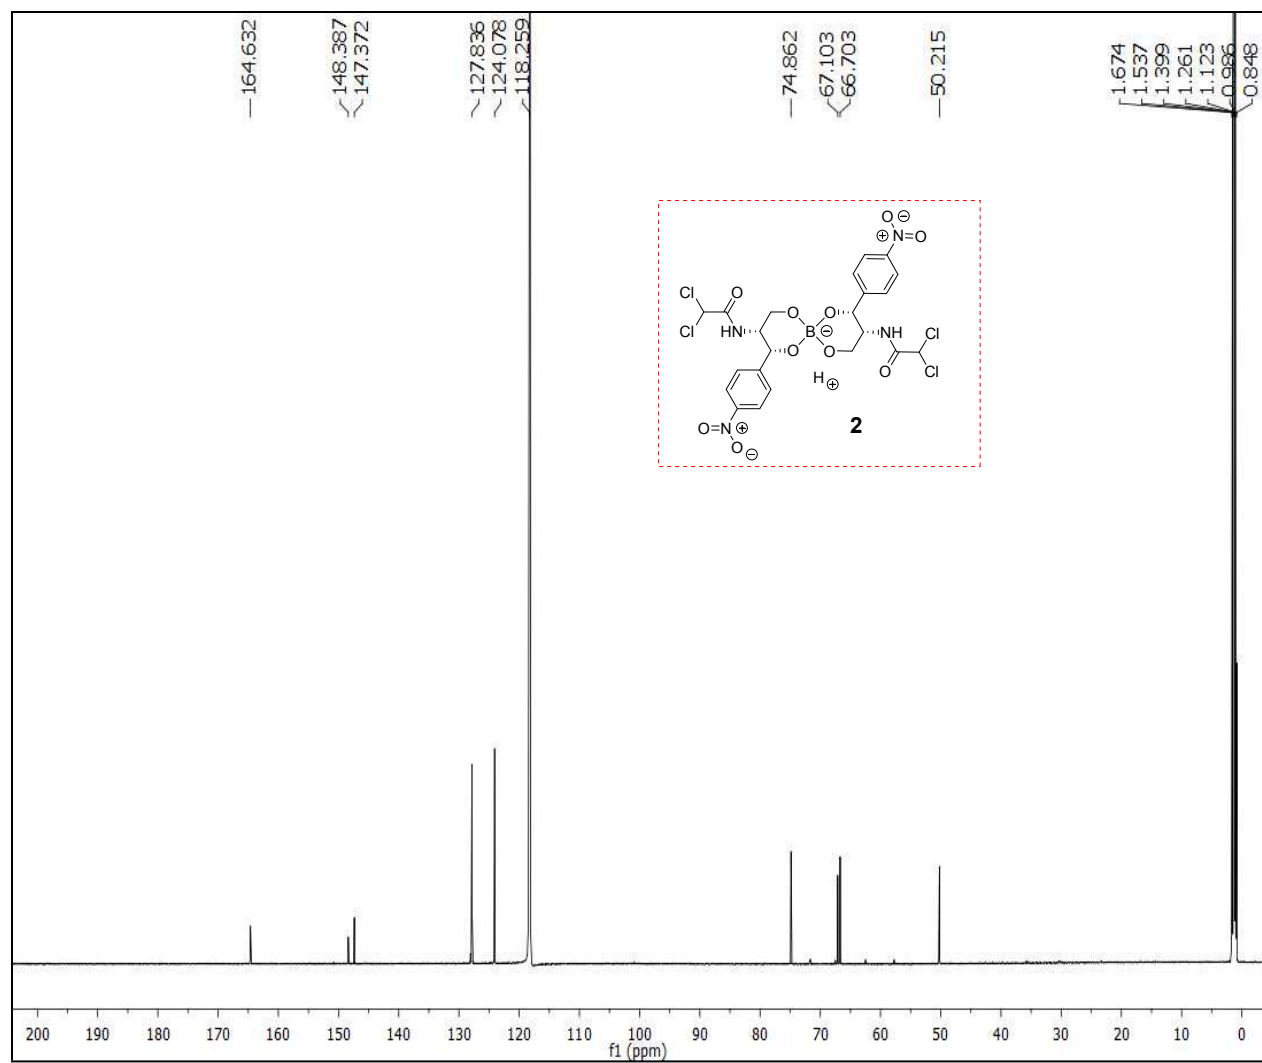

**Figure S2.**  $^{13}\text{C}$  NMR spectrum of Chloramphenicol-borate ester (**2**) in  $\text{CD}_3\text{CN}$ , in 150 MHz.

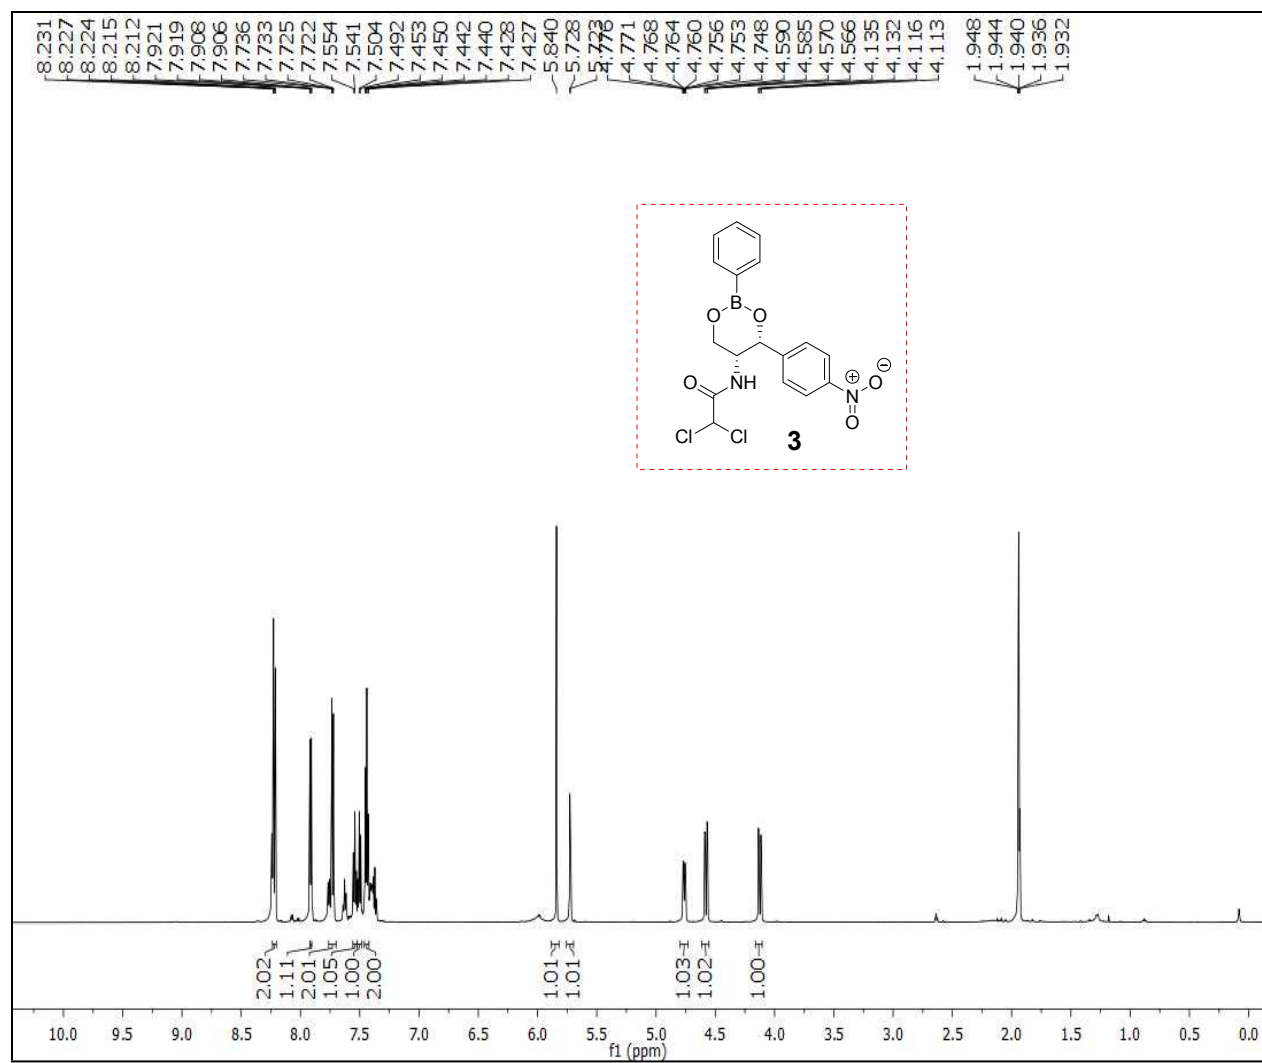

**Figure S3.** <sup>1</sup>H NMR spectrum of Chloramphenicol-phenyl boronate ester (**3**) in CD<sub>3</sub>CN, in 600 MHz.

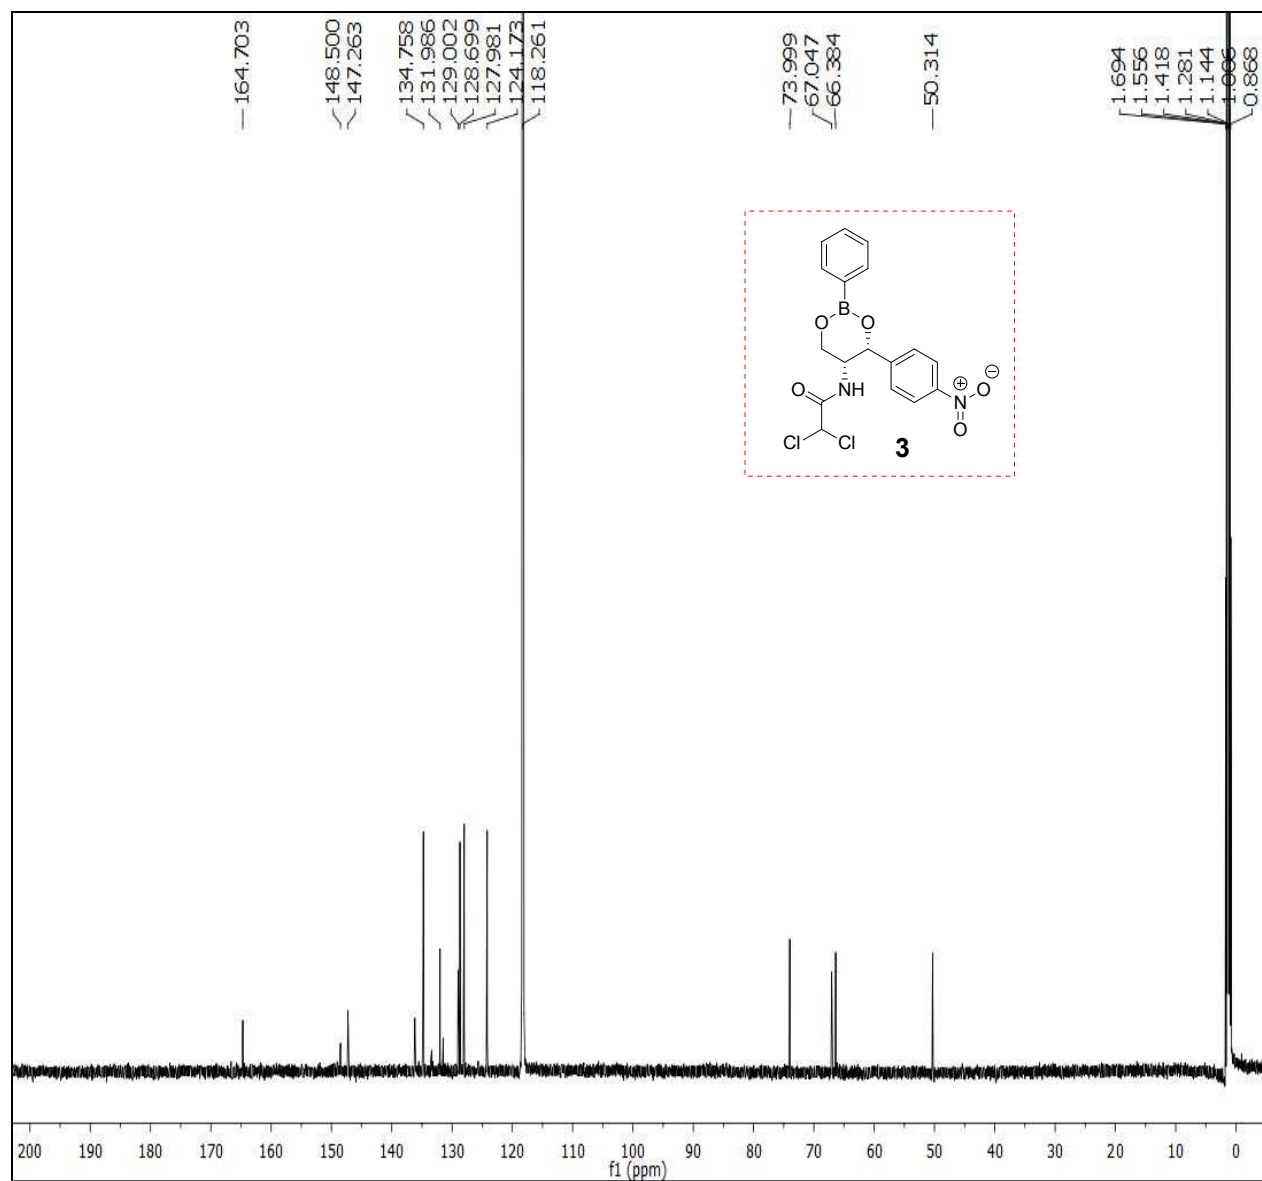

**Figure S4.**  $^{13}\text{C}$  NMR spectrum of Chloramphenicol-phenyl boronate ester (**3**) in  $\text{CD}_3\text{CN}$ , in 150 MHz.

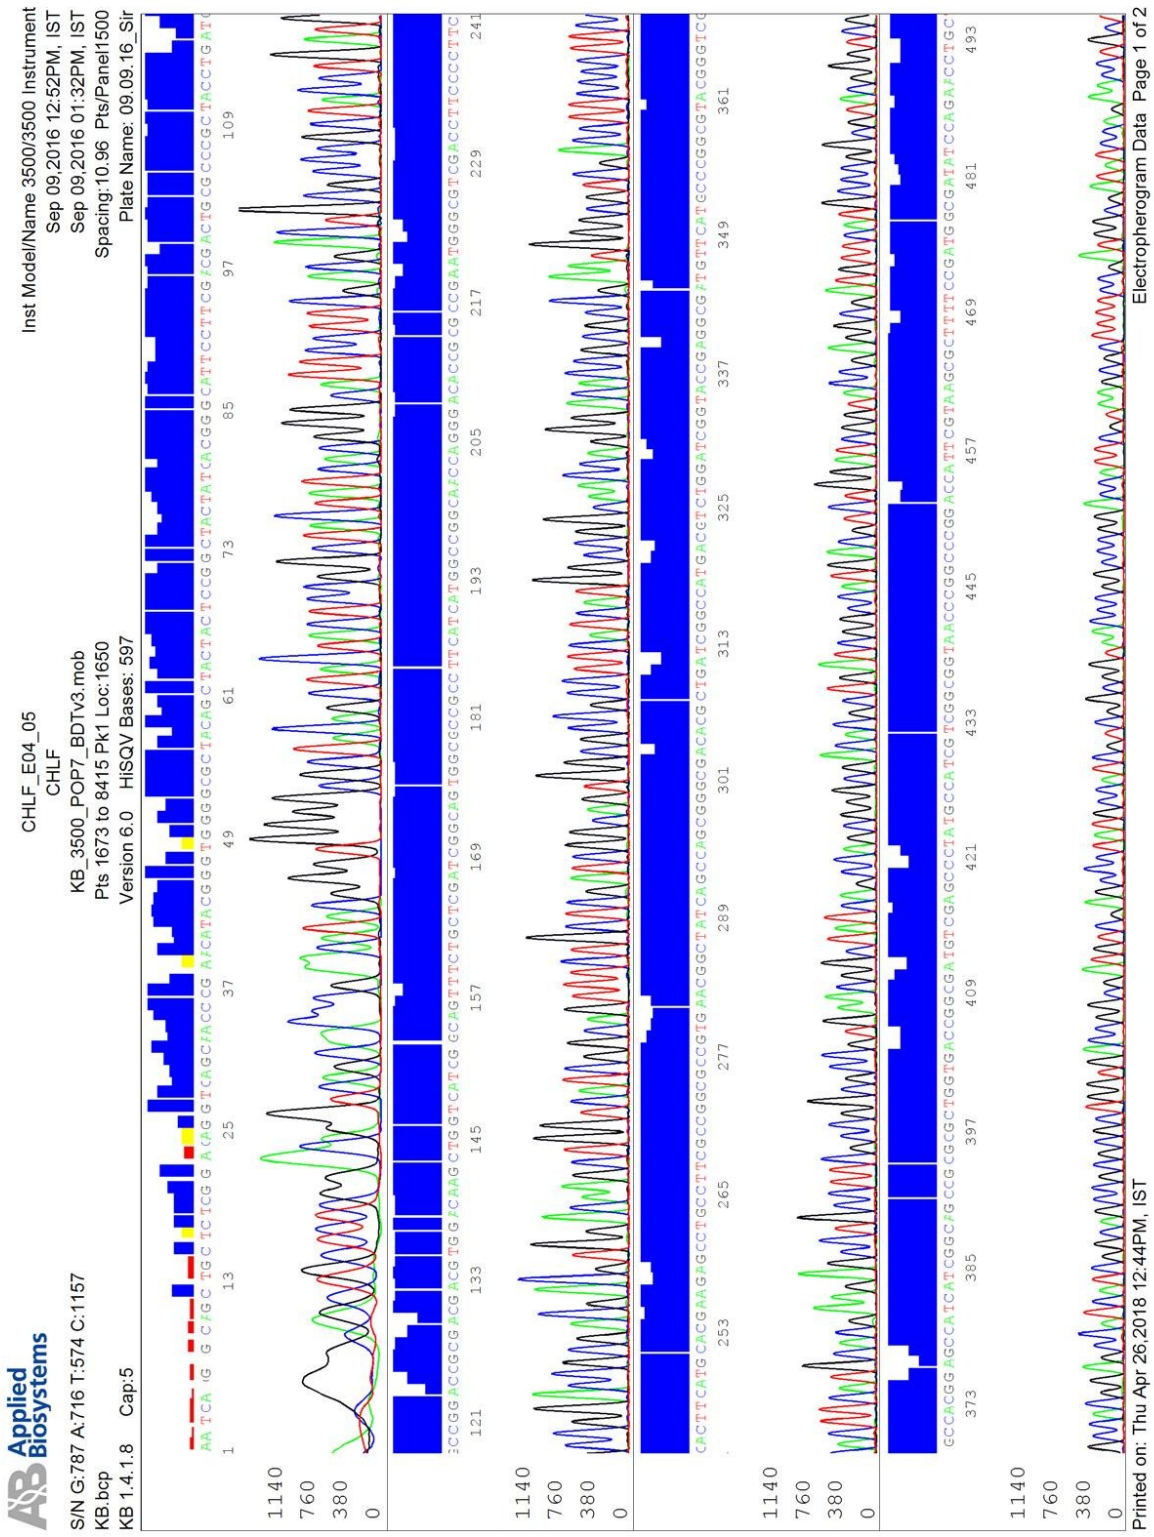

Figure S5. Forward primer based sequencing data of chloramphenicol acetyl transferase obtained from *P. aeruginosa* SS3.

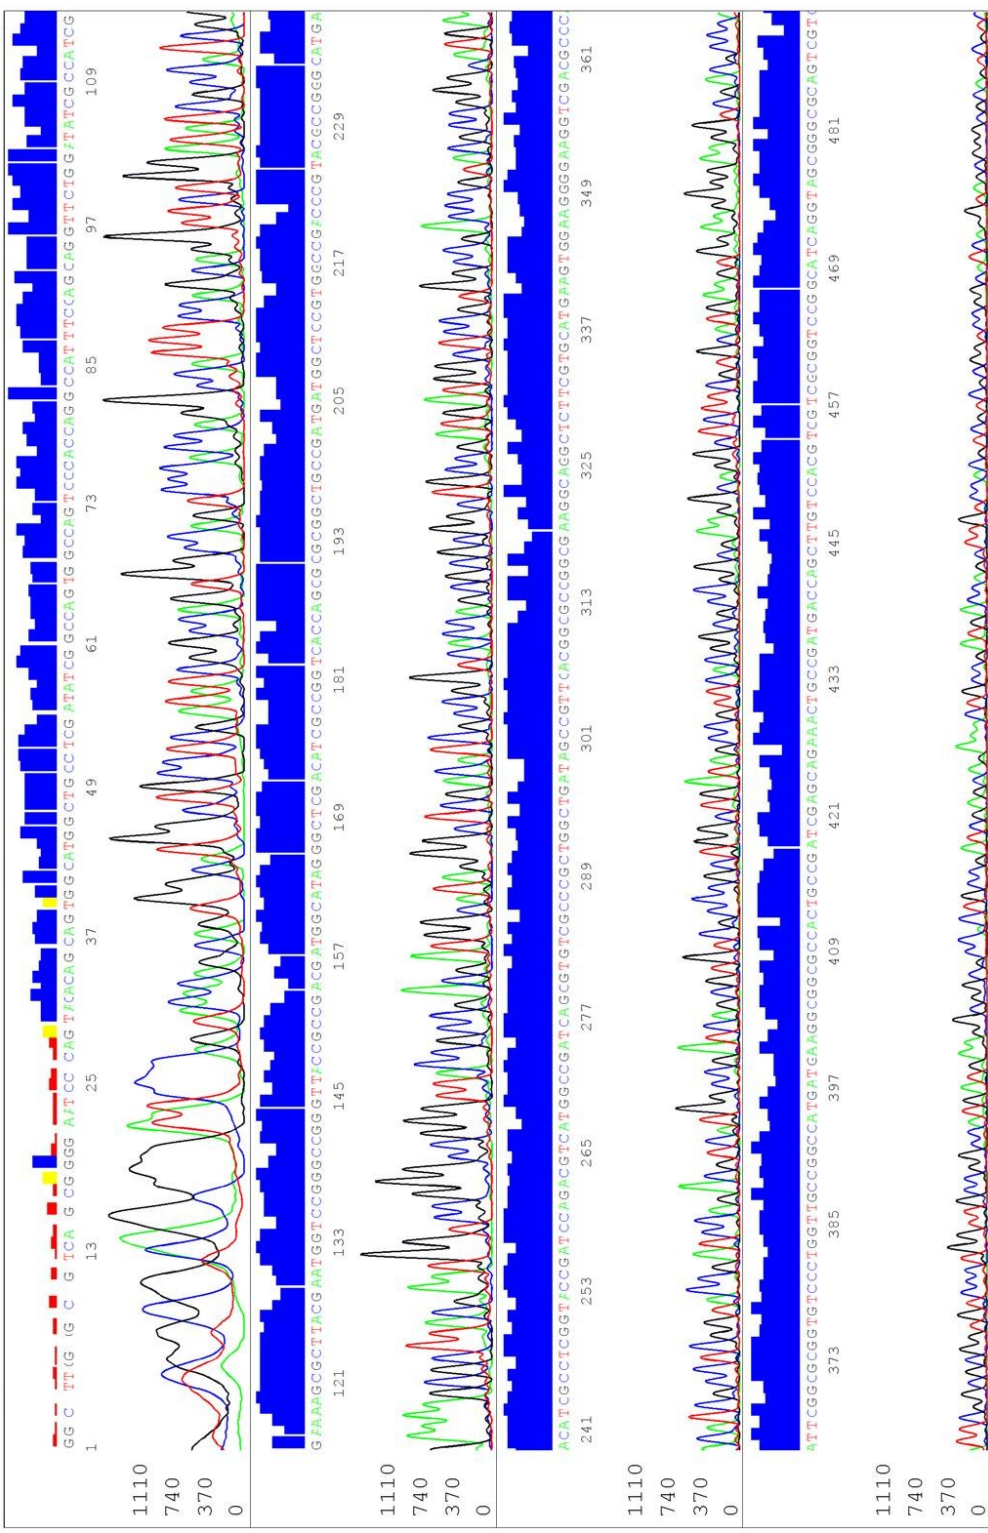

**Figure S6.** Reverse primer based sequencing data of chloramphenicol acetyl transferase obtained from *P. aeruginosa* SS3.

## Contig result of obtained sequences from *Pseudomonas aeruginosa* strain SS3, Chloramphenicol acetyl transferase

ATGGGCAACTATTTTCGAGAGCCCATTTCAGGGGCAAGCTGCTCTCGGAACAGGTCAGCAACCCGAACAT  
 ACGGGTGGGGCGCTACAGCTACTACTCCGGCTACTATCACGGGCATTCCTTCGACGACTGCGCCCGCT  
 ACCTGATGCCGGACCGCGACGACGTGGACAAGCTGGTCATCGGCAGTTTCTGCTCGATCGGCAGTGGC  
 GCCGCCTTCATCATGGCCGGCAACCAGGGACACCGCGCCGAATGGGCGTCGACCTTCCCCTTCCACTT  
 CATGCACGAAGAGCCTGCCTTCGCCGGCGCCGTGAACGGCTATCAGCCAGCGGGCGACACGCTGATCG  
 GCCATGACGTCTGGATCGGTACCGAGGGCGATGTTTCATGCCCGGCGTACGGGTTCGGCCACGGAGCCATC  
 ATCGGCAGCCGCGCGCTGGTGACCGGGCGATGTCGAGCCCTATGCCATCGTCGGCGGTAACCCGGCCCC  
 GACCATTCGTAAGCGCTTTTCCGATGGCGATATCCAGAACCTGCTGGAAATGGCCTGGTGGGACTGGC  
 CACTGGCCGATATCGAGGCAGCCATGCCACTGCTGTGTACTGGGGATATCCCCGCTCTTGTACCAGGC  
 ACTGGAACAGCGCCAGGCCTCGGCCTGA

Figure S7. Homology analysis of the obtained sequence of *catB* gene from *P. aeruginosa* EXR1.

NCBI Blast:Nucleotide Seq

blast.ncbi.nlm.nih.gov/Blast.cgi#alnHdr\_1013864167

Alignments

Download GenBank Graphics

Pseudomonas aeruginosa strain N17-1, complete genome  
 Sequence ID: CP014948.1 Length: 6370730 Number of Matches: 1

Range 1: 4837043 to 4837681 GenBank Graphics

| Score          | Expect | Identities   | Gaps      | Strand    |
|----------------|--------|--------------|-----------|-----------|
| 1166 bits(631) | 0.0    | 638/641(99%) | 2/641(0%) | Plus/Plus |

Features: Chloramphenicol acetyltransferase

| Query                                                             | Subject                                                                |
|-------------------------------------------------------------------|------------------------------------------------------------------------|
| 10 ATGGGCAACTATTTTCGAGAGCCCATTTCAGGGGCAAGCTGCTCTCGGAACAGGTCAGCAAC | 4837102 ATGGGCAACTATTTTCGAGAGCCCATTTCAGGGGCAAGCTGCTCTCGGAACAGGTCAGCAAC |
| 70 CCGAACAATCGGGTGGGGCGCTACAGCTACTACTCCGGCTACTATCACGGGCATTCCTTC   | 4837162 CCGAACAATCGGGTGGGGCGCTACAGCTACTACTCCGGCTACTATCACGGGCATTCCTTC   |
| 130 GACGACTGCGCCCGCTACCTGATGCCGGACCGCGACGCTGGACAAGCTGGTTCATCGGC   | 4837222 GACGACTGCGCCCGCTACCTGATGCCGGACCGCGACGCTGGACAAGCTGGTTCATCGGC    |
| 190 AGTTTCTGCTCGATCGGCAGTGGCCGCGCTTTCATCATGGCCGGCAACAGGGACACCGC   | 4837282 AGTTTCTGCTCGATCGGCAGTGGCCGCGCTTTCATCATGGCCGGCAACAGGGACACCGC    |
| 250 GCCGAATGGGCGTGCACCTTCCCCTTCCACTTCATGCAAGAAGAGCTGCTTGGCCGGC    | 4837342 GCCGAATGGGCGTGCACCTTCCCCTTCCACTTCATGCAAGAAGAGCTGCTTGGCCGGC     |
| 310 GCCGTGAACGGCTATCAGCCAGCGGGCGACACGCTGATCGGCCATGACGCTGGATCGGT   | 4837402 GCCGTGAACGGCTATCAGCCAGCGGGCGACACGCTGATCGGCCATGACGCTGGATCGGT    |
| 370 ACCGAGGCGATGTTTCATGCCCGGCGTACGGGTGGCCACGGAGCCATCATCGGCAGCCGC  | 4837462 ACCGAGGCGATGTTTCATGCCCGGCGTACGGGTGGCCACGGAGCCATCATCGGCAGCCGC   |
| 430 GCGCTGTTGACCGCGATGTCGAGCCCTATGCCATCGTGGCGGTAACCCGGCCCGGACC    | 4837522 GCGCTGTTGACCGCGATGTCGAGCCCTATGCCATCGTGGCGGTAACCCGGCCCGGACC     |
| 490 ATTCGTAAGCGCTTTTCCGATGGCGATATCCAGAACCTGCTGGAAATGGCCTGGTGGGAC  | 4837582 ATTCGTAAGCGCTTTTCCGATGGCGATATCCAGAACCTGCTGGAAATGGCCTGGTGGGAC   |

Contig fungal seque...TXT contig sequences\_ch...txt

Show all downloads...

12:23 PM 9/12/2016
